# Supplementary material
Source: publisher figshare collection journal article supplement (https://sage.figshare.com/ndownloader/files/22936130)
Supplement: Supplementary file 1 [file 22936130]

Table (suppl. material) – Domains, subdomains, categories and illustrative core ideas with frequencies in the clinicians' interview

| Area                                               | Domain                                              | Category                                                                                           | Sub-category                    | Illustrative Core Idea                                                                                                                                                                                                                                 | Frequency |
|----------------------------------------------------|-----------------------------------------------------|----------------------------------------------------------------------------------------------------|---------------------------------|--------------------------------------------------------------------------------------------------------------------------------------------------------------------------------------------------------------------------------------------------------|-----------|
| Identity and gender: the clinician's point of view | 1. Psychological issues and associated risk factors | Psychological distress                                                                             | Anxiety                         | He came to me lamenting symptoms of separation anxiety                                                                                                                                                                                                 | General   |
|                                                    |                                                     |                                                                                                    | Depression                      | I saw both children at different times for marked anxiety and depression                                                                                                                                                                               | Variant   |
|                                                    |                                                     |                                                                                                    | Discomfort related to sexuality | The girl showed some problems related to sexuality. There was something unclear about the adult world that frightened her                                                                                                                              | Variant   |
|                                                    |                                                     | Stigma and social and educational discrimination                                                   | Rigidity and school closure     | The girl refused to go to school. An episode had happened on a school trip, the girl refused to wear this pink hat, the teachers insisted, she refused to get off the bus and had a sort of serious hysterical crisis                                  | General   |
|                                                    |                                                     |                                                                                                    | Social stigma                   | The MtF here are considered only freaks                                                                                                                                                                                                                | Typical   |
|                                                    |                                                     |                                                                                                    | Bullying                        | At the age of eighteen he hanged himself because he had been the subject of quite heavy acts of bullying in high school                                                                                                                                | Typical   |
|                                                    |                                                     | Trauma/Abuse                                                                                       |                                 | A child, son of friends, put a hand in her underwear and put a finger in it                                                                                                                                                                            | Variant   |
|                                                    |                                                     | Self-administration of hormones (iatrogen risk)                                                    |                                 | The problem is that many take hormones on the internet and or take the birth control pill, buy stuff on the internet of all kinds and you have to invent something to keep them under control otherwise they kill themselves, they massacre themselves | Variant   |
|                                                    |                                                     | Self harm/Suicide                                                                                  |                                 | Sadly, at eighteen years old he hanged himself                                                                                                                                                                                                         | Variant   |
|                                                    | 2. Clinician's interpretation of GV                 | Distress due to the incongruence between physical and mental aspects – Primary problem of identity |                                 | It seemed like an identity problem. When I supervised the case, even the expert therapists agreed                                                                                                                                                      | Typical   |
|                                                    |                                                     | Secondary to other problems                                                                        | Result of family dynamics       | The concern about their identity was more connected to their parents' marital difficulties                                                                                                                                                             | Typical   |
|                                                    |                                                     |                                                                                                    | Problems related to sexuality   | This was a five-year-old girl who showed unusual sexual behaviors, but I think that they were mostly due to a family situation                                                                                                                         | Variant   |
|                                                    |                                                     |                                                                                                    | Non acceptance of homosexuality | The child was not so disturbed; he showed many anxious symptoms, but his issues were mostly related to hidden difficulties in accepting his homosexuality                                                                                              | Variant   |

|                                |                                        |                                   |                                                |                                                                                                                                                                                                                                                                                                                   |         |
|--------------------------------|----------------------------------------|-----------------------------------|------------------------------------------------|-------------------------------------------------------------------------------------------------------------------------------------------------------------------------------------------------------------------------------------------------------------------------------------------------------------------|---------|
|                                |                                        |                                   | Desire for social revenge                      | I think that in his FtM identity the core aspect is related to a desire for social revenge; the importance given to gender roles is very strong, so I can never tell if it was about wanting to be a man because “men can do everything” or rather simply about deeply feeling you are a man, whatever that means | Variant |
|                                | 3. Reflections on identity and gender  | Binary vs non-binary paths        | Imposition of a binary choice (M or F)         | I say this because I think binarism is creating problems, especially in the FtM, because there is this need to immediately choose what you want to be: female or male. Now this boy is feeling very well in his non-binary identity                                                                               | Typical |
|                                |                                        |                                   | Non-binary patterns in society                 | As a child she did not wear a skirt, she did not wear pink, but she had rather feminine ways. As a teenager he had a moment of transition in which he felt like a man, but now I think it's all more fluid, even regarding their orientation                                                                      | Variant |
|                                |                                        | Persistence/Desistance            | Persists recognizable from an early age        | Personally, among the cases I have seen, no teenager has desisted but rather persisted                                                                                                                                                                                                                            | General |
|                                |                                        |                                   | Desistance after puberty                       | I have seen two youngsters that have reverted to the gender they were given at birth during puberty                                                                                                                                                                                                               | Variant |
|                                |                                        |                                   |                                                |                                                                                                                                                                                                                                                                                                                   |         |
| Family: structure and dynamics | 4. Family situation at the onset of GV | Parental crisis                   | Parental conflict                              | There was a family discomfort, a very complicated situation, big couple problems                                                                                                                                                                                                                                  | Typical |
|                                |                                        |                                   | Parental separation/divorce                    | There was a rather complicated family situation. The mother have had an affair with a family friend and the child was a bit involved in this thing                                                                                                                                                                | Variant |
|                                |                                        | Structural problems in the family | Problems related to gender roles in the family | One of the cases concerns the daughter of a beautiful woman who had a first-born who was a model and with this second child had difficulties; so we started working with this little girl who felt very different from her beautiful mother and sister                                                            | Typical |
|                                |                                        |                                   | Involving parents                              | The girl did not understand what was happening, but she witnessed things not appropriate for her age. I mean, not sex scenes, but she witnessed something that made her aware that her mother was cheating on her father.                                                                                         | Variant |
|                                | 5. Reactions of parents to GV          | Concern                           | Relative to sexual orientation                 | Her mother was very worried about her daughter's tendency to choose men's clothes and games and she feared she would become a lesbian                                                                                                                                                                             | General |
|                                |                                        |                                   | Relative to social stigma                      | The mum is worried about what could have happened at school because there boys should be                                                                                                                                                                                                                          | General |

|                                                            |                                                           |                          |                                              |                                                                                                                                                                                                                                                                 |         |
|------------------------------------------------------------|-----------------------------------------------------------|--------------------------|----------------------------------------------|-----------------------------------------------------------------------------------------------------------------------------------------------------------------------------------------------------------------------------------------------------------------|---------|
|                                                            |                                                           |                          |                                              | boys and girls should be girls, and no one can dress differently than what you would expect                                                                                                                                                                     |         |
|                                                            |                                                           | Refuse                   | Refusal of the non-standard identity         | Many parents refuse to accept. They tell me: "how is it possible that it is happening to me, to my son among everyone!"                                                                                                                                         | Typical |
|                                                            |                                                           |                          | Refusal of requests relating to clothing     | The parents were completely in crisis because she hated pink, she wanted to wear male underpants and masculine clothes, she wanted everything a boy would want. They refused categorically to let her wear what she wanted.                                     | Typical |
|                                                            |                                                           | Sense of guilt or shame  | Guilt                                        | Often among Catholic parents there is a sense of guilt                                                                                                                                                                                                          | Typical |
|                                                            |                                                           |                          | Shame                                        | They only brough her to me when she was six; before then, her parents, out of fear and out of shame I think, said that they never saw anything, but it was a long time since the dysphoria had appeared                                                         | Variant |
|                                                            |                                                           | Acceptance               | Acceptance after an initial period of refuse | What I have often found is that at the beginning parents hope that there is an external reason for gender incongruence. A medical issue, something easier to accept. Then, however, many parents begin to understand and accept the complexity of the situation | Typical |
|                                                            |                                                           |                          | Acceptance since the beginning               | These last parents were very open-minded, they turned to me to understand whether to pay attention to something rather than something else                                                                                                                      | Typical |
|                                                            |                                                           |                          |                                              |                                                                                                                                                                                                                                                                 |         |
| Approach to practice: positive aspects and critical issues | 6. Relationship between clinician and the family          | Positive                 | Only with the mother                         | His mother was very cooperative, while his father always refused to accept the situation                                                                                                                                                                        | Typical |
|                                                            |                                                           |                          | With both parents                            | Since they were so open minded, they immediately sought the best way to help their child                                                                                                                                                                        | Variant |
|                                                            |                                                           | Scarce collaboration     |                                              | The mother chose to suspend the psychotherapy apparently for economic reasons, but my opinion is that she couldn't stand the fact that we were talking about his relationship with her, and that she felt blamed                                                | Variant |
|                                                            | 7. Network between clinicians and the specialized centers | No knowledge/No research |                                              | What's more, I tell you that these centers are little known. When I had to ask for a consultation on medical-hormonal matters, I did not know who to turn to                                                                                                    | General |
|                                                            |                                                           | Skepticism               |                                              | I think they are too stigmatizing and medicalizing                                                                                                                                                                                                              | Typical |

|  |                                                 |                                   |                                                         |                                                                                                                                                                          |         |
|--|-------------------------------------------------|-----------------------------------|---------------------------------------------------------|--------------------------------------------------------------------------------------------------------------------------------------------------------------------------|---------|
|  | 8. Training on the topic: experiences and needs | Need for adequate training        | Difficulty in referring GV youth to other professionals | It is difficult to think of someone that could offer them proper care, many professionals fear that they lack the right training, that they do not have the right tools. | General |
|  |                                                 |                                   | Need to be updated on the latest developments           | I would like to have had more specific training on this subject because it's impossible to keep up with what literature says on the matter                               | General |
|  |                                                 |                                   | Risk of doing harm                                      | We can make a real mess if we are not well informed and prepared to deal with these issues                                                                               | Typical |
|  |                                                 | Experiences carried out           | Attendance of specific courses                          | I did a training course on the subject at the Careggi hospital                                                                                                           | Variant |
|  |                                                 |                                   | Cycle of meetings with experts                          | I attended meetings with an expert professor and I became passionate about the subject                                                                                   | Variant |
|  | 9. Overall evaluation of the care               | Positive outcomes                 |                                                         | We did not want to continue therapy; after all he says he is feeling well, and he is calm, he is neither in denial nor anything, he is at ease with what he is           | Typical |
|  |                                                 | Drop-out                          |                                                         | Therapy was interrupted because their parents thought that "dysphoria was cured"                                                                                         | Typical |
|  |                                                 | Uncertainty about medical choices |                                                         | I was very much in doubt about how to behave in front of a seemingly very important decision related to the sexuality or identity of this child                          | Variant |
